# Supplementary material for: High Yields of Formic Acid and Acetic Acid during Multi-generational Oxidation of Toluene
Source: Copernicus journal article supplement (doi:10.5194/egusphere-2026-234), 2026-01-26
Supplement: Supplementary file 1 [file egusphere-2026-234-supplement.pdf]

Supporting Information for:

## **High Yields of Formic Acid and Acetic Acid during Multi-generational Oxidation of Toluene**

Hengqing Shen<sup>1,2</sup>, Liubin Huang<sup>1\*</sup>, Yue Zhao<sup>3</sup>, Min Zhao<sup>1</sup>, Yu Yang<sup>1</sup>, Huan Li<sup>4</sup>, Huihui Wu<sup>2</sup>, Zhongming Chen<sup>2\*</sup>

<sup>1</sup>Environment Research Institute, Shandong University, Qingdao, Shandong 266237, China

<sup>2</sup>State Key Laboratory of Regional Environment and Sustainability, College of Environmental Sciences and Engineering, Peking University, Beijing 100871, China

<sup>3</sup>School of Environmental Science and Engineering, Shanghai Jiao Tong University, Shanghai 200240, China

<sup>4</sup>China Center for Information Industry Development, Beijing 100871, China

**\* Corresponding Author**

Liubin Huang (hliubin@sdu.edu.cn) and Zhongming Chen (zmchen@pku.edu.cn).

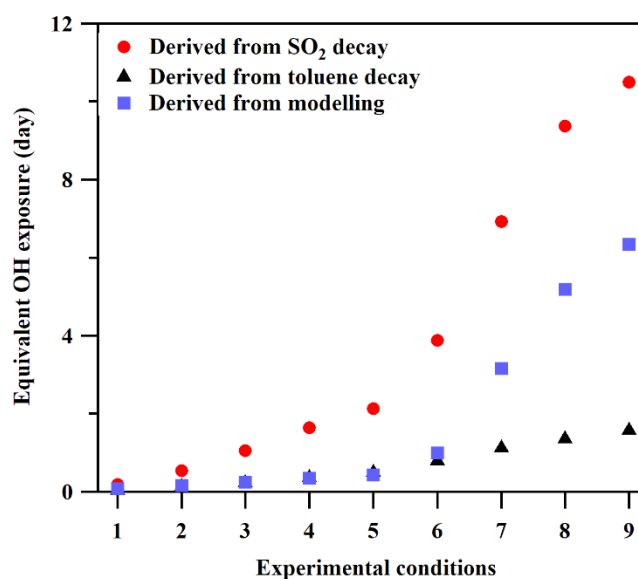

**Figure S1.** •OH exposures derived from three different methods (SO<sub>2</sub> decay, toluene decay, and modeling). The experimental conditions of 1–9 correspond to one lamp illuminated with the residence time of 3.9 s (1), 15.8 s (2), 27.5 s (3), 39.3 s (4), and 51.0 s (5), and to 2 (6), 4 (7), 6 (8), and 8 (9) lamps illuminated with the residence time of 51.0 s.

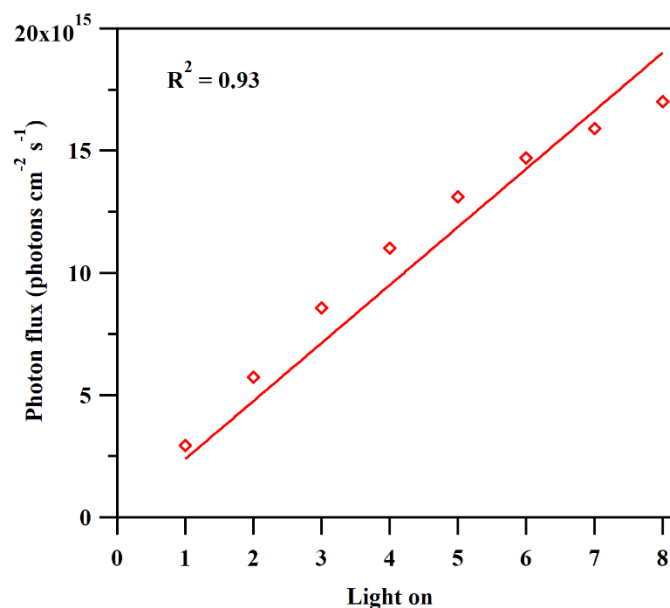

**Figure S2.** Photon fluxes estimated by the model with different lamps illuminated (up to 8).

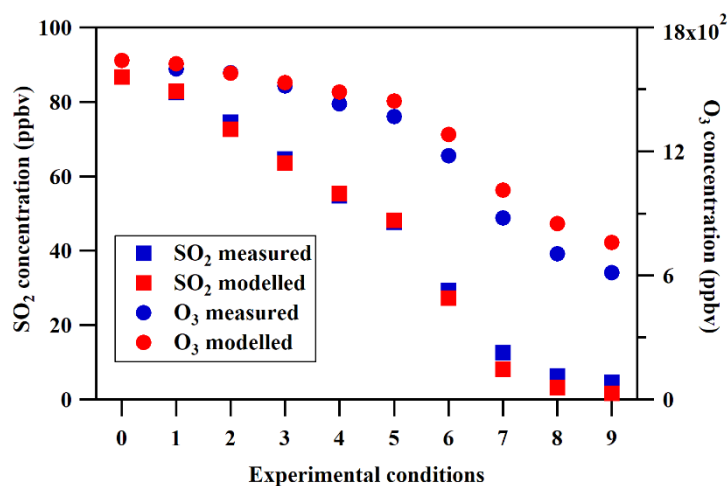

**Figure S3.** Comparison of the decay of SO<sub>2</sub> and O<sub>3</sub> measured in the OFR and simulated by the model. The experimental conditions of 0–9 correspond to no lamp illuminated (0), one lamp illuminated with the residence time of 3.9 s (1), 15.8 s (2), 27.5 s (3), 39.3 s (4), and 51.0 s (5), and to 2 (6), 4 (7), 6 (8), and 8 (9) lamps illuminated with the residence time of 51.0 s.

**Table S1. The derived equivalent •OH exposures under different experimental conditions.**

| Number of lamps illuminated | Positions of sample collection <sup>a</sup> | Residence time (s) | Modeled •OH concentration (molecules cm <sup>-3</sup> ) |                       | Rquivalent •OH exposures (days) |        |
|-----------------------------|---------------------------------------------|--------------------|---------------------------------------------------------|-----------------------|---------------------------------|--------|
|                             |                                             |                    | 20% RH                                                  | 70% RH                | 20% RH                          | 70% RH |
| 1                           | 5%                                          | 3.9                | 5.21×10 <sup>9</sup>                                    | 1.59×10 <sup>10</sup> | 0.07                            | 0.20   |
| 1                           | 25%                                         | 15.8               | 3.15×10 <sup>9</sup>                                    | 8.77×10 <sup>9</sup>  | 0.16                            | 0.44   |
| 1                           | 45%                                         | 27.5               | 2.69×10 <sup>9</sup>                                    | 1.05×10 <sup>10</sup> | 0.24                            | 0.93   |
| 1                           | 65%                                         | 39.3               | 2.67×10 <sup>9</sup>                                    | 1.20×10 <sup>10</sup> | 0.34                            | 1.52   |
| 1                           | 85%                                         | 51.0               | 2.62×10 <sup>9</sup>                                    | 1.48×10 <sup>10</sup> | 0.43                            | 2.43   |
| 2                           | 85%                                         | 51.0               | 6.04×10 <sup>9</sup>                                    | 4.33×10 <sup>10</sup> | 0.99                            | 7.10   |
| 4                           | 85%                                         | 51.0               | 1.93×10 <sup>10</sup>                                   | 8.04×10 <sup>10</sup> | 3.16                            | 13.18  |
| 6                           | 85%                                         | 51.0               | 3.16×10 <sup>10</sup>                                   | 9.33×10 <sup>10</sup> | 5.19                            | 15.30  |
| 8                           | 85%                                         | 51.0               | 3.87×10 <sup>10</sup>                                   | 9.54×10 <sup>10</sup> | 6.34                            | 15.64  |

<sup>a</sup> axial length of the OFR
